# Supplementary material for: Comparing the Use of Two Different Approaches to Assess Teachers’ Knowledge of Models and Modeling in Science Teaching
Source: MDPI journal article supplement (doi:10.3390/educsci13040405), 2023-04-17
Supplement: s1 [file s1]

## Supplementary File S6

**Correlation Matrix for 25 Items in the 2nd Version of the KMM-ST Survey**

| Variable      | CM_Museum | CM_Turtle | CM_Language | CM_Biomem | CM_Pumpkin | NM_Museum | NM_Eating | NM_Biomem | NM_Pumpkin | NM_Population | MM_Museum | MM_Turtle | MM_Language | MM_Eating | MM_Climate | PM_Turtle | PM_Language | PM_Eating | PM_Climate | PM_Population | TM_Eating | TM_Climate | TM_Biomem | TM_Pumpkin | TM_Population |
|---------------|-----------|-----------|-------------|-----------|------------|-----------|-----------|-----------|------------|---------------|-----------|-----------|-------------|-----------|------------|-----------|-------------|-----------|------------|---------------|-----------|------------|-----------|------------|---------------|
| CM Museum     | 1         |           |             |           |            |           |           |           |            |               |           |           |             |           |            |           |             |           |            |               |           |            |           |            |               |
| CM Turtle     | .12       | 1         |             |           |            |           |           |           |            |               |           |           |             |           |            |           |             |           |            |               |           |            |           |            |               |
| CM Language   | -.07      | -.07      | 1           |           |            |           |           |           |            |               |           |           |             |           |            |           |             |           |            |               |           |            |           |            |               |
| CM Biomem     | .09       | -.00      | .02         | 1         |            |           |           |           |            |               |           |           |             |           |            |           |             |           |            |               |           |            |           |            |               |
| CM Pumpkin    | .07       | .22       | -.01        | .28       | 1          |           |           |           |            |               |           |           |             |           |            |           |             |           |            |               |           |            |           |            |               |
| NM Museum     | .14       | .08       | -.05        | -.04      | .04        | 1         |           |           |            |               |           |           |             |           |            |           |             |           |            |               |           |            |           |            |               |
| NM Eating     | .31       | .24       | -.01        | .11       | .14        | .21       | 1         |           |            |               |           |           |             |           |            |           |             |           |            |               |           |            |           |            |               |
| NM Biomem     | .05       | .17       | -.22        | .14       | .11        | .13       | .17       | 1         |            |               |           |           |             |           |            |           |             |           |            |               |           |            |           |            |               |
| NM Pumpkin    | .13       | -.00      | -.02        | -.07      | -.15       | .03       | .19       | -.06      | 1          |               |           |           |             |           |            |           |             |           |            |               |           |            |           |            |               |
| NM Population | .11       | .10       | -.07        | .03       | .04        | .14       | .38       | .19       | .02        | 1             |           |           |             |           |            |           |             |           |            |               |           |            |           |            |               |
| MM Museum     | -.06      | .06       | -.01        | -.04      | .03        | .26       | -.09      | .08       | .02        | .09           | 1         |           |             |           |            |           |             |           |            |               |           |            |           |            |               |
| MM Turtle     | .01       | .18       | .18         | .05       | .12        | .16       | .16       | -.00      | .11        | .09           | .14       | 1         |             |           |            |           |             |           |            |               |           |            |           |            |               |
| MM Language   | .03       | .06       | .00         | .02       | -.10       | .06       | .24       | -.09      | .13        | .07           | -.07      | .01       | 1           |           |            |           |             |           |            |               |           |            |           |            |               |
| MM Eating     | .07       | .10       | -.02        | .07       | .00        | .10       | .26       | .03       | .19        | .08           | .09       | .01       | .22         | 1         |            |           |             |           |            |               |           |            |           |            |               |
| MM Climate    | .11       | .21       | -.04        | .05       | .13        | .02       | .17       | .20       | .07        | .09           | .01       | .07       | .06         | .02       | 1          |           |             |           |            |               |           |            |           |            |               |
| PM Turtle     | .21       | .24       | .03         | -.01      | -.01       | .09       | .21       | .18       | .01        | .09           | -.10      | .05       | .17         | .14       | .14        | 1         |             |           |            |               |           |            |           |            |               |
| PM Language   | .01       | .12       | -.06        | .19       | -.03       | .03       | .13       | .08       | .05        | .14           | -.05      | -.03      | .13         | .23       | -.05       | .18       | 1           |           |            |               |           |            |           |            |               |
| PM Eating     | .05       | .27       | .02         | .12       | -.06       | -.02      | .18       | .22       | -.03       | .08           | -.06      | .06       | -.00        | .21       | .09        | .09       | .19         | 1         |            |               |           |            |           |            |               |
| PM Climate    | .06       | -.03      | .03         | -.01      | .11        | .01       | -.06      | -.08      | -.08       | .07           | -.09      | .00       | -.12        | -.17      | -.02       | .02       | -.13        | .05       | 1          |               |           |            |           |            |               |
| PM Population | .18       | .05       | -.05        | .06       | -.00       | .14       | .18       | .07       | .12        | .18           | .02       | .13       | .06         | .10       | .03        | .10       | .07         | .24       | .16        | 1             |           |            |           |            |               |
| TM Eating     | .12       | .17       | -.15        | .02       | .01        | .15       | .31       | .21       | .05        | .27           | -.01      | .07       | .06         | .21       | .14        | .13       | .04         | .23       | .06        | .17           | 1         |            |           |            |               |
| TM Climate    | .06       | .04       | -.14        | .13       | .03        | .18       | .11       | .36       | .15        | .16           | -.03      | -.00      | .08         | .09       | .20        | -.07      | .05         | .09       | .06        | -.05          | .18       | 1          |           |            |               |
| TM Biomem     | .08       | -.05      | -.13        | -.13      | -.13       | .07       | .19       | -.00      | .18        | .12           | .03       | .03       | -.02        | -.06      | .10        | .13       | .01         | .02       | -.02       | -.03          | .22       | .04        | 1         |            |               |
| TM Pumpkin    | -.01      | .16       | -.11        | .00       | .09        | .08       | .08       | -.09      | -.06       | .00           | -.03      | -.00      | .15         | -.00      | .14        | .05       | .05         | .03       | .08        | .06           | .04       | -.00       | .03       | 1          |               |
| TM Population | .14       | .09       | -.07        | .01       | .05        | .18       | .30       | .14       | .12        | .20           | .03       | .09       | .04         | .08       | .20        | .17       | .03         | .13       | -.12       | .23           | .32       | -.10       | .20       | .02        | 1             |
