# Supplementary material for: Comparing the Use of Two Different Approaches to Assess Teachers’ Knowledge of Models and Modeling in Science Teaching
Source: MDPI journal article supplement (doi:10.3390/educsci13040405), 2023-04-17
Supplement: s1 [file s1]

## Supplementary File S4

### Correlation Matrix for 24 Items in the 1st Version of the KMM-ST Survey

| Variable | MP1  | MP2  | MP3  | MP4<br>R | MP5  | MM<br>K<br>1R | MM<br>K<br>2R | MM<br>K<br>3 | MM<br>K<br>4R | MM<br>K<br>5 | MM<br>K<br>6 | MM<br>K<br>7 | IN1  | IN2  | IN3  | IN<br>4R | IN5  | SM1  | SM2  | SM3  | EC<br>1R | EC2 | EC<br>3R | EC4 |
|----------|------|------|------|----------|------|---------------|---------------|--------------|---------------|--------------|--------------|--------------|------|------|------|----------|------|------|------|------|----------|-----|----------|-----|
| MP1      | 1    |      |      |          |      |               |               |              |               |              |              |              |      |      |      |          |      |      |      |      |          |     |          |     |
| MP2      | .15  | 1    |      |          |      |               |               |              |               |              |              |              |      |      |      |          |      |      |      |      |          |     |          |     |
| MP3      | .07  | .11  | 1    |          |      |               |               |              |               |              |              |              |      |      |      |          |      |      |      |      |          |     |          |     |
| MP4R     | -.12 | .10  | .07  | 1        |      |               |               |              |               |              |              |              |      |      |      |          |      |      |      |      |          |     |          |     |
| MP5      | -.04 | .11  | .02  | -.05     | 1    |               |               |              |               |              |              |              |      |      |      |          |      |      |      |      |          |     |          |     |
| MMK1R    | -.03 | .09  | -.10 | .43      | -.02 | 1             |               |              |               |              |              |              |      |      |      |          |      |      |      |      |          |     |          |     |
| MMK2R    | -.06 | .08  | -.10 | .17      | -.05 | .25           | 1             |              |               |              |              |              |      |      |      |          |      |      |      |      |          |     |          |     |
| MMK3     | .35  | -.01 | .16  | -.12     | -.19 | -.15          | -.08          | 1            |               |              |              |              |      |      |      |          |      |      |      |      |          |     |          |     |
| MMK4R    | -.05 | .12  | -.02 | .42      | .06  | .58           | .35           | -.14         | 1             |              |              |              |      |      |      |          |      |      |      |      |          |     |          |     |
| MMK5     | .06  | .17  | .26  | -.16     | -.24 | -.20          | -.04          | .10          | -.08          | 1            |              |              |      |      |      |          |      |      |      |      |          |     |          |     |
| MMK6     | .06  | .06  | .22  | -.11     | -.27 | -.20          | .01           | .31          | -.17          | .27          | 1            |              |      |      |      |          |      |      |      |      |          |     |          |     |
| MMK7     | .07  | .15  | .44  | -.03     | .16  | -.15          | -.02          | .05          | .03           | .23          | .18          | 1            |      |      |      |          |      |      |      |      |          |     |          |     |
| IN1      | .38  | .07  | .17  | -.21     | -.33 | -.15          | -.03          | .41          | -.11          | .35          | .27          | .15          | 1    |      |      |          |      |      |      |      |          |     |          |     |
| IN2      | .16  | .30  | .22  | .04      | .10  | -.02          | .10           | -.06         | .03           | .12          | -.03         | .07          | .10  | 1    |      |          |      |      |      |      |          |     |          |     |
| IN3      | .23  | .39  | .03  | -.18     | .17  | -.09          | .04           | -.04         | -.11          | .02          | .20          | .18          | .06  | .26  | 1    |          |      |      |      |      |          |     |          |     |
| IN4R     | .03  | .08  | .04  | .33      | .03  | .50           | .39           | -.03         | .59           | -.12         | -.06         | .10          | -.12 | -.03 | -.09 | 1        |      |      |      |      |          |     |          |     |
| IN5      | .17  | .20  | .07  | -.08     | .11  | -.10          | -.12          | .09          | -.06          | .14          | .20          | .32          | .13  | .17  | .35  | -.03     | 1    |      |      |      |          |     |          |     |
| SM1      | .10  | .15  | -.03 | -.14     | .35  | -.13          | -.16          | -.07         | -.07          | -.01         | .07          | .22          | -.03 | .12  | .35  | .07      | .31  | 1    |      |      |          |     |          |     |
| SM2      | .29  | .05  | .26  | -.12     | -.02 | -.06          | -.04          | .21          | .01           | .03          | .19          | .07          | .26  | .21  | .05  | -.05     | .18  | .17  | 1    |      |          |     |          |     |
| SM3      | .17  | .35  | .28  | .00      | .17  | .09           | .00           | .15          | .14           | .16          | -.02         | .03          | .25  | .27  | .05  | .10      | .09  | .19  | .32  | 1    |          |     |          |     |
| EC1R     | -.06 | .06  | .03  | .23      | -.40 | .26           | .39           | -.17         | .37           | .14          | -.00         | -.04         | -.03 | .15  | -.04 | .35      | -.06 | -.10 | .07  | .06  | 1        |     |          |     |
| EC2      | .39  | .02  | .19  | -.15     | -.09 | -.11          | -.03          | .41          | -.09          | .22          | .30          | -.07         | .21  | .06  | .15  | -.04     | .07  | .04  | .31  | .18  | .02      | 1   |          |     |
| EC3R     | .05  | .07  | -.06 | .22      | -.39 | .28           | .28           | -.01         | .20           | .11          | .09          | -.14         | .03  | .07  | .03  | .28      | .14  | .03  | -.07 | -.00 | .46      | .17 | 1        |     |
| EC4      | .39  | .04  | .22  | -.19     | -.06 | -.08          | -.12          | .10          | -.12          | .19          | .21          | .02          | .13  | .28  | .40  | -.13     | .05  | .14  | .28  | .07  | .00      | .49 | .03      | 1   |
