# Supplementary material for: Comparing the Use of Two Different Approaches to Assess Teachers’ Knowledge of Models and Modeling in Science Teaching
Source: MDPI journal article supplement (doi:10.3390/educsci13040405), 2023-04-17
Supplement: s1 [file s1]

### Supplementary File S5

#### Factor Loadings for 2<sup>nd</sup> Version of KMM-ST Survey Showing a One-Factor Model

|               | <b>Factor 1</b> | <b>Communality</b> |
|---------------|-----------------|--------------------|
| NM_Eating     | 0.67            | <b>0.45</b>        |
| TM_Eating     | 0.52            | <b>0.27</b>        |
| TM_Population | 0.44            | <b>0.19</b>        |
| NM_Population | 0.43            | <b>0.19</b>        |
| CM_Turtle     | 0.38            | <b>0.15</b>        |
| NM_Biomem     | 0.37            | <b>0.14</b>        |
| PM_Turtle     | 0.35            | <b>0.12</b>        |
| PM_Eating     | 0.34            | <b>0.12</b>        |
| CM_Museum     | 0.33            | <b>0.11</b>        |
| MM_Eating     | 0.33            | <b>0.11</b>        |
| PM_Population | 0.32            | <b>0.10</b>        |
| MM_Climate    | 0.32            | <b>0.10</b>        |
| NM_Museum     | 0.31            | <b>0.09</b>        |
| TM_Climate    | 0.25            | <b>0.06</b>        |
| PM_Language   | 0.23            | <b>0.05</b>        |
| TM_Biomem     | 0.21            | <b>0.04</b>        |
| MM_Language   | 0.21            | <b>0.04</b>        |
| MM_Turtle     | 0.19            | <b>0.04</b>        |
| NM_Pumpkin    | 0.19            | <b>0.04</b>        |
| CM_Language   | -0.15           | <b>0.02</b>        |
| CM_Biomem     | 0.14            | <b>0.02</b>        |
| CM_Pumpkin    | 0.12            | <b>0.02</b>        |
| TM_Pumpkin    | 0.11            | <b>0.01</b>        |
| MM_Museum     | 0.03            | <b>0.00</b>        |
| PM_Climate    | -0.03           | <b>0.00</b>        |

**Factor Loadings for 2<sup>nd</sup> Version of KMM-ST Survey Showing a Five-Factor Model**

|               | <b>Factor 1</b> | <b>Factor 2</b> | <b>Factor 3</b> | <b>Factor 4</b> | <b>Factor 5</b> | <b>Communality</b> |
|---------------|-----------------|-----------------|-----------------|-----------------|-----------------|--------------------|
| NM_Eating     | 0.62            | 0.01            | 0.19            | 0.08            | -0.04           | <b>0.49</b>        |
| TM_Population | 0.53            | -0.01           | -0.06           | -0.05           | 0.06            | <b>0.27</b>        |
| TM_Eating     | 0.45            | 0.23            | 0.00            | -0.09           | -0.02           | <b>0.31</b>        |
| TM_Biomem     | 0.38            | 0.04            | -0.17           | -0.36           | 0.00            | <b>0.28</b>        |
| CM_Museum     | 0.37            | -0.01           | -0.01           | 0.06            | -0.09           | <b>0.14</b>        |
| NM_Population | 0.36            | 0.16            | 0.01            | -0.01           | 0.08            | <b>0.20</b>        |
| PM_Population | 0.35            | -0.06           | 0.03            | 0.09            | 0.01            | <b>0.13</b>        |
| PM_Turtle     | 0.33            | -0.02           | 0.12            | 0.06            | -0.14           | <b>0.16</b>        |
| MM_Climate    | 0.27            | 0.17            | -0.08           | 0.10            | -0.02           | <b>0.13</b>        |
| TM_Pumpkin    | 0.15            | -0.06           | -0.01           | 0.12            | -0.07           | <b>0.04</b>        |
| NM_Biomem     | 0.02            | 0.72            | 0.00            | 0.06            | 0.03            | <b>0.55</b>        |
| TM_Climate    | -0.03           | 0.50            | 0.07            | -0.07           | 0.01            | <b>0.25</b>        |
| CM_Language   | -0.03           | -0.33           | 0.05            | 0.16            | 0.05            | <b>0.13</b>        |
| MM_Eating     | 0.07            | 0.02            | 0.59            | -0.04           | 0.09            | <b>0.39</b>        |
| PM_Language   | -0.01           | 0.09            | 0.43            | 0.02            | -0.12           | <b>0.21</b>        |
| MM_Language   | 0.14            | -0.12           | 0.36            | -0.07           | -0.07           | <b>0.18</b>        |
| PM_Climate    | 0.11            | -0.03           | -0.29           | 0.16            | -0.12           | <b>0.11</b>        |
| PM_Eating     | 0.17            | 0.16            | 0.20            | 0.12            | -0.13           | <b>0.17</b>        |
| CM_Pumpkin    | 0.07            | 0.06            | -0.13           | 0.56            | 0.04            | <b>0.34</b>        |
| CM_Biomem     | -0.06           | 0.15            | 0.15            | 0.32            | -0.09           | <b>0.17</b>        |
| CM_Turtle     | 0.26            | 0.07            | 0.10            | 0.31            | 0.01            | <b>0.23</b>        |
| NM_Pumpkin    | 0.21            | -0.07           | 0.17            | -0.27           | 0.08            | <b>0.16</b>        |
| MM_Museum     | -0.06           | 0.03            | 0.03            | 0.01            | 0.67            | <b>0.45</b>        |
| NM_Museum     | 0.27            | 0.06            | 0.01            | 0.00            | 0.35            | <b>0.22</b>        |
| MM_Turtle     | 0.26            | -0.17           | -0.01           | 0.21            | 0.26            | <b>0.18</b>        |

**Factor Loadings for 2<sup>nd</sup> Version of KMM-ST Survey Showing a Four-Factor Model**

|                      | <b>Factor 1</b> | <b>Factor 2</b> | <b>Factor 3</b> | <b>Factor 4</b> | <b>Communality</b> |
|----------------------|-----------------|-----------------|-----------------|-----------------|--------------------|
| <b>TM_Population</b> | 0.68            | 0.05            | 0.06            | -0.03           | <b>0.47</b>        |
| <b>TM_Eating</b>     | 0.65            | 0.13            | 0.00            | 0.17            | <b>0.47</b>        |
| <b>TM_Biomem</b>     | 0.63            | -0.23           | -0.30           | -0.21           | <b>0.62</b>        |
| <b>NM_Eating</b>     | 0.62            | 0.39            | 0.21            | 0.05            | <b>0.59</b>        |
| <b>NM_Population</b> | 0.53            | 0.13            | 0.07            | 0.32            | <b>0.41</b>        |
| <b>MM_Language</b>   | 0.00            | 0.72            | -0.15           | -0.03           | <b>0.54</b>        |
| <b>MM_Eating</b>     | 0.12            | 0.70            | 0.08            | -0.10           | <b>0.52</b>        |
| <b>CM_Pumpkin</b>    | 0.05            | -0.14           | 0.81            | 0.04            | <b>0.68</b>        |
| <b>CM_Biomem</b>     | -0.02           | 0.13            | 0.74            | -0.02           | <b>0.57</b>        |
| <b>PM_Climate</b>    | -0.09           | -0.30           | 0.03            | 0.77            | <b>0.69</b>        |
| <b>PM_Population</b> | 0.19            | 0.27            | 0.00            | 0.68            | <b>0.57</b>        |

*Note.* These factor loadings show the resulting factor structure after dropping 14 items from the original 25-item survey.
