# Supplementary material for: Comparing the Use of Two Different Approaches to Assess Teachers’ Knowledge of Models and Modeling in Science Teaching
Source: MDPI journal article supplement (doi:10.3390/educsci13040405), 2023-04-17
Supplement: s1 [file s1]

Archive with 6 entries (6 files):
- Supplementary File S1.pdf
- Supplementary File S2.pdf
- Supplementary File S3.pdf
- Supplementary File S4.pdf
- Supplementary File S5.pdf
- Supplementary File S6.pdf
