# Supplementary material for: Comparing the Use of Two Different Approaches to Assess Teachers’ Knowledge of Models and Modeling in Science Teaching
Source: MDPI journal article supplement (doi:10.3390/educsci13040405), 2023-04-17
Supplement: s1 [file s1 › Supplementary File S1.pdf]

## Supplementary File S1

### Content Validation Worksheet for 1st Version of KMM-ST Survey

#### Sub-construct 1, Factor 1: Modeling Practices

| Item Number | Relevance<br>Provide numerical value 1-4<br>(see instructions document) | Comments/Feedback |
|-------------|-------------------------------------------------------------------------|-------------------|
| 1           |                                                                         |                   |
| 2           |                                                                         |                   |
| 3           |                                                                         |                   |
| 4           |                                                                         |                   |
| 5           |                                                                         |                   |

#### Sub-construct 1, Factor 2: Metamodeling Knowledge

| Item Number | Relevance<br>Provide numerical value 1-4<br>(see instructions document) | Comments/Feedback |
|-------------|-------------------------------------------------------------------------|-------------------|
| 1           |                                                                         |                   |
| 2           |                                                                         |                   |
| 3           |                                                                         |                   |
| 4           |                                                                         |                   |
| 5           |                                                                         |                   |
| 6           |                                                                         |                   |
| 7           |                                                                         |                   |
| 8           |                                                                         |                   |
| 9           |                                                                         |                   |

#### Sub-construct 2, Factor 1: Investigation

| Item Number | Relevance<br>Provide numerical value 1-4<br>(see instructions document) | Comments/Feedback |
|-------------|-------------------------------------------------------------------------|-------------------|
| 1           |                                                                         |                   |

|   |  |  |
|---|--|--|
| 2 |  |  |
| 3 |  |  |
| 4 |  |  |
| 5 |  |  |

**Sub-construct 2, Factor 2: Sensemaking**

| <b>Item Number</b> | <b>Relevance</b><br>Provide numerical value 1-4<br>(see instructions document) | <b>Comments/Feedback</b> |
|--------------------|--------------------------------------------------------------------------------|--------------------------|
| 1                  |                                                                                |                          |
| 2                  |                                                                                |                          |
| 3                  |                                                                                |                          |
| 4                  |                                                                                |                          |

**Sub-construct 2, Factor 3: Evaluating and Communicating**

| <b>Item Number</b> | <b>Relevance</b><br>Provide numerical value 1-4<br>(see instructions document) | <b>Comments/Feedback</b> |
|--------------------|--------------------------------------------------------------------------------|--------------------------|
| 1                  |                                                                                |                          |
| 2                  |                                                                                |                          |
| 3                  |                                                                                |                          |
| 4                  |                                                                                |                          |
| 5                  |                                                                                |                          |
