# Supplementary material for: Comparing the Use of Two Different Approaches to Assess Teachers’ Knowledge of Models and Modeling in Science Teaching
Source: MDPI journal article supplement (doi:10.3390/educsci13040405), 2023-04-17
Supplement: s1 [file s1 › Supplementary File S2.pdf]

## Supplementary File S2

### Content Validation Worksheet for 2nd Version of KMM-ST Survey

| Item Name     | Assigned Component | Relevancy Score (1 – 4) | Level assigned to each answer option             |
|---------------|--------------------|-------------------------|--------------------------------------------------|
| MM_Language   | Multiple Models    |                         | A =            B =            C =            D = |
| MM_Eating     | Multiple Models    |                         | A =            B =            C =            D = |
| MM_Museum     | Multiple Models    |                         | A =            B =            C =            D = |
| MM_Turtle     | Multiple Models    |                         | A =            B =            C =            D = |
| MM_Climate    | Multiple Models    |                         | A =            B =            C =            D = |
| PM_Climate    | Purpose of Models  |                         | A =            B =            C =            D = |
| PM_Population | Purpose of Models  |                         | A =            B =            C =            D = |
| PM_Turtle     | Purpose of Models  |                         | A =            B =            C =            D = |
| PM_Language   | Purpose of Models  |                         | A =            B =            C =            D = |
| PM_Eating     | Purpose of Models  |                         | A =            B =            C =            D = |
| CM_Pumpkin    | Changing Models    |                         | A =            B =            C =            D = |
| CM_Biomem     | Changing Models    |                         | A =            B =            C =            D = |
| CM_Museum     | Changing Models    |                         | A =            B =            C =            D = |
| CM_Turtle     | Changing Models    |                         | A =            B =            C =            D = |
| CM_Language   | Changing Models    |                         | A =            B =            C =            D = |
| TM_Population | Testing Models     |                         | A =            B =            C =            D = |

|               |                  |  |     |     |     |     |
|---------------|------------------|--|-----|-----|-----|-----|
| TM_Eating     | Testing Models   |  | A = | B = | C = | D = |
| TM_Biomem     | Testing Models   |  | A = | B = | C = | D = |
| TM_Climate    | Testing Models   |  | A = | B = | C = | D = |
| TM_Pumpkin    | Testing Models   |  | A = | B = | C = | D = |
| NM_Eating     | Nature of Models |  | A = | B = | C = | D = |
| NM_Population | Nature of Models |  | A = | B = | C = | D = |
| NM_Museum     | Nature of Models |  | A = | B = | C = | D = |
| NM_Biomem     | Nature of Models |  | A = | B = | C = | D = |
| NM_Pumpkin    | Nature of Models |  | A = | B = | C = | D = |
