# Supplementary material for: Comparing the Use of Two Different Approaches to Assess Teachers’ Knowledge of Models and Modeling in Science Teaching
Source: MDPI journal article supplement (doi:10.3390/educsci13040405), 2023-04-17
Supplement: s1 [file s1 › Supplementary File S3.pdf]

### Supplementary File S3

#### Factor Loadings for 1<sup>st</sup> Version of KMM-ST Survey Showing a Six-Factor Model

|              | <b>Factor 1</b> | <b>Factor 2</b> | <b>Factor 3</b> | <b>Factor 4</b> | <b>Factor 5</b> | <b>Factor 6</b> | <b>Communality</b> |
|--------------|-----------------|-----------------|-----------------|-----------------|-----------------|-----------------|--------------------|
| <b>IN4R</b>  | 0.81            | 0.09            | 0.00            | 0.02            | 0.12            | -0.10           | <b>0.62</b>        |
| <b>MMK4R</b> | 0.76            | -0.02           | -0.02           | -0.08           | 0.02            | 0.10            | <b>0.62</b>        |
| <b>MMK1R</b> | 0.68            | -0.01           | -0.01           | -0.04           | -0.18           | 0.03            | <b>0.52</b>        |
| <b>MP4R</b>  | 0.47            | -0.15           | 0.05            | -0.14           | 0.02            | 0.05            | <b>0.31</b>        |
| <b>MMK2R</b> | 0.39            | -0.10           | 0.21            | 0.06            | -0.03           | 0.02            | <b>0.25</b>        |
| <b>MMK3</b>  | 0.03            | 0.72            | 0.02            | -0.14           | 0.10            | -0.12           | <b>0.74</b>        |
| <b>EC2</b>   | -0.01           | 0.60            | 0.11            | 0.14            | -0.15           | 0.12            | <b>0.57</b>        |
| <b>MP1</b>   | 0.08            | 0.57            | -0.07           | 0.21            | -0.10           | 0.10            | <b>0.47</b>        |
| <b>IN1</b>   | -0.12           | 0.43            | 0.22            | -0.07           | 0.19            | 0.14            | <b>0.36</b>        |
| <b>SM2</b>   | 0.01            | 0.38            | -0.07           | 0.01            | 0.01            | 0.32            | <b>0.34</b>        |
| <b>MP5</b>   | 0.09            | -0.11           | -0.82           | 0.15            | 0.04            | 0.10            | <b>0.53</b>        |
| <b>EC1R</b>  | 0.34            | -0.21           | 0.56            | 0.06            | -0.03           | 0.22            | <b>0.41</b>        |
| <b>EC3R</b>  | 0.33            | 0.01            | 0.52            | 0.26            | -0.08           | -0.05           | <b>0.39</b>        |
| <b>MMK5</b>  | -0.22           | 0.03            | 0.37            | -0.01           | 0.31            | 0.26            | <b>0.40</b>        |
| <b>MMK6</b>  | -0.11           | 0.28            | 0.30            | 0.16            | 0.29            | -0.11           | <b>0.47</b>        |
| <b>IN3</b>   | -0.08           | 0.01            | -0.04           | 0.78            | 0.05            | 0.02            | <b>0.65</b>        |
| <b>SM1</b>   | 0.01            | 0.02            | -0.27           | 0.45            | 0.14            | 0.00            | <b>0.30</b>        |
| <b>IN5</b>   | 0.01            | 0.08            | -0.02           | 0.41            | 0.31            | -0.05           | <b>0.32</b>        |
| <b>EC4</b>   | -0.17           | 0.32            | 0.08            | 0.33            | -0.17           | 0.26            | <b>0.64</b>        |
| <b>MMK7</b>  | 0.05            | -0.05           | -0.06           | 0.10            | 0.79            | 0.00            | <b>0.41</b>        |
| <b>MP3</b>   | -0.03           | 0.13            | 0.02            | -0.17           | 0.42            | 0.40            | <b>0.40</b>        |
| <b>IN2</b>   | -0.05           | -0.10           | 0.02            | 0.22            | -0.02           | 0.55            | <b>0.38</b>        |
| <b>SM3</b>   | 0.15            | 0.21            | -0.18           | -0.06           | 0.05            | 0.54            | <b>0.26</b>        |
| <b>MP2</b>   | 0.13            | -0.05           | -0.03           | 0.29            | 0.14            | 0.30            | <b>0.29</b>        |

**Factor Loadings for 1<sup>st</sup> Version of KMM-ST Survey Showing a Seven-Factor Model**

|              | <b>Factor 1</b> | <b>Factor 2</b> | <b>Factor 3</b> | <b>Factor 4</b> | <b>Factor 5</b> | <b>Factor 6</b> | <b>Factor 7</b> | <b>Communality</b> |
|--------------|-----------------|-----------------|-----------------|-----------------|-----------------|-----------------|-----------------|--------------------|
| <b>IN4R</b>  | 0.81            | -0.01           | 0.11            | -0.03           | 0.04            | 0.12            | -0.07           | <b>0.63</b>        |
| <b>MMK4R</b> | 0.75            | -0.01           | -0.04           | -0.03           | -0.07           | 0.04            | 0.10            | <b>0.61</b>        |
| <b>MMK1R</b> | 0.68            | -0.01           | -0.03           | 0.01            | -0.05           | -0.16           | 0.05            | <b>0.52</b>        |
| <b>MP4R</b>  | 0.47            | 0.05            | -0.14           | -0.07           | -0.13           | 0.05            | 0.02            | <b>0.31</b>        |
| <b>MMK2R</b> | 0.39            | 0.22            | -0.09           | -0.04           | 0.07            | -0.04           | 0.02            | <b>0.25</b>        |
| <b>MP5</b>   | 0.02            | -0.81           | -0.13           | 0.01            | 0.13            | 0.06            | 0.11            | <b>0.75</b>        |
| <b>EC1R</b>  | 0.34            | 0.56            | -0.27           | 0.07            | 0.02            | 0.02            | 0.11            | <b>0.56</b>        |
| <b>EC3R</b>  | 0.32            | 0.52            | -0.01           | 0.03            | 0.25            | -0.13           | -0.02           | <b>0.47</b>        |
| <b>MMK5</b>  | -0.24           | 0.40            | -0.01           | 0.02            | 0.03            | 0.29            | 0.20            | <b>0.35</b>        |
| <b>MMK6</b>  | -0.10           | 0.28            | 0.27            | 0.11            | 0.16            | 0.27            | -0.13           | <b>0.33</b>        |
| <b>MMK3</b>  | 0.02            | 0.03            | 0.74            | 0.02            | -0.06           | 0.03            | 0.03            | <b>0.57</b>        |
| <b>MP1</b>   | 0.09            | -0.06           | 0.44            | 0.29            | 0.17            | -0.10           | 0.15            | <b>0.39</b>        |
| <b>IN1</b>   | -0.19           | 0.29            | 0.44            | -0.07           | 0.04            | 0.09            | 0.28            | <b>0.47</b>        |
| <b>EC4</b>   | -0.04           | 0.00            | -0.01           | 0.92            | 0.05            | 0.01            | -0.04           | <b>0.86</b>        |
| <b>EC2</b>   | 0.05            | 0.07            | 0.41            | 0.48            | 0.01            | -0.05           | 0.04            | <b>0.48</b>        |
| <b>IN3</b>   | -0.08           | -0.05           | -0.08           | 0.24            | 0.67            | 0.02            | 0.03            | <b>0.60</b>        |
| <b>IN5</b>   | -0.04           | 0.01            | 0.13            | -0.09           | 0.51            | 0.20            | 0.05            | <b>0.35</b>        |
| <b>SM1</b>   | -0.02           | -0.25           | 0.01            | 0.03            | 0.46            | 0.07            | 0.08            | <b>0.33</b>        |
| <b>MMK7</b>  | 0.06            | -0.07           | 0.02            | -0.09           | 0.17            | 0.80            | -0.09           | <b>0.69</b>        |
| <b>MP3</b>   | 0.01            | 0.01            | -0.02           | 0.23            | -0.28           | 0.62            | 0.22            | <b>0.58</b>        |
| <b>SM3</b>   | 0.06            | -0.10           | 0.11            | -0.05           | -0.01           | -0.03           | 0.76            | <b>0.61</b>        |
| <b>IN2</b>   | -0.05           | 0.06            | -0.24           | 0.20            | 0.16            | 0.04            | 0.43            | <b>0.33</b>        |
| <b>MP2</b>   | 0.05            | 0.04            | -0.09           | -0.08           | 0.36            | 0.04            | 0.42            | <b>0.34</b>        |
| <b>SM2</b>   | 0.02            | -0.05           | 0.24            | 0.24            | -0.02           | 0.06            | 0.28            | <b>0.27</b>        |
